# Supplementary material for: Hierarchical branched α-MnO2: one-step synthesis and catalytic activity
Source: Royal Society of Chemistry journal article supplement (doi:10.1039/c7ra08567b), 2017-01-01
Supplement: c7ra08567b1.pdf [file c7ra08567b1.pdf]

### Supplementary information

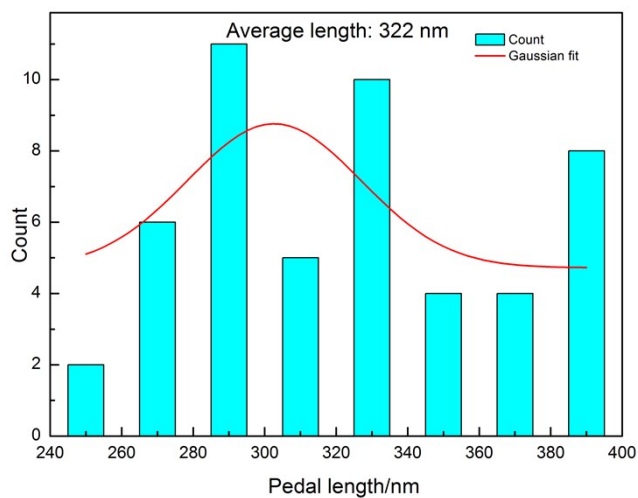

Fig.S1 the pedal length distribution based on 50 counts selected randomly in 5 SEM images

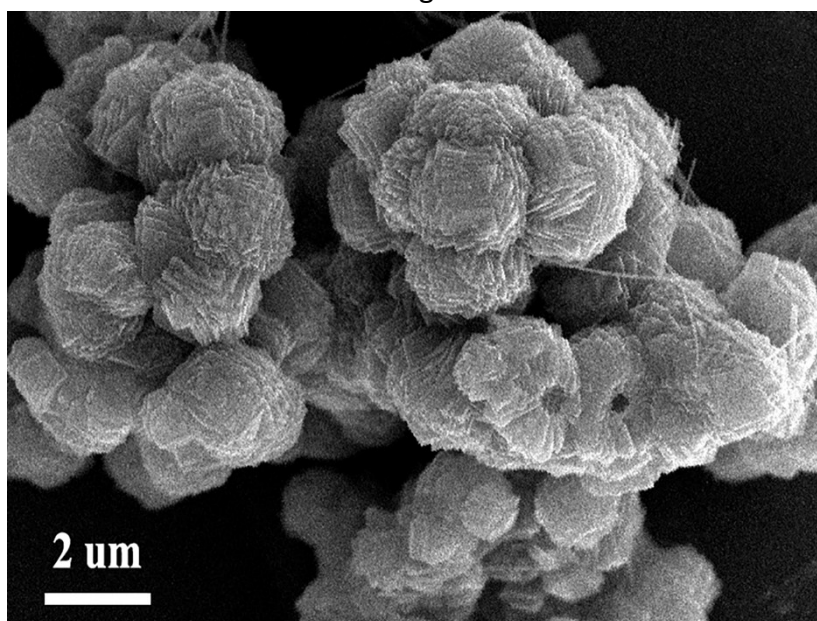

Figure S2 SEM image of the source  $\text{MnCO}_3$

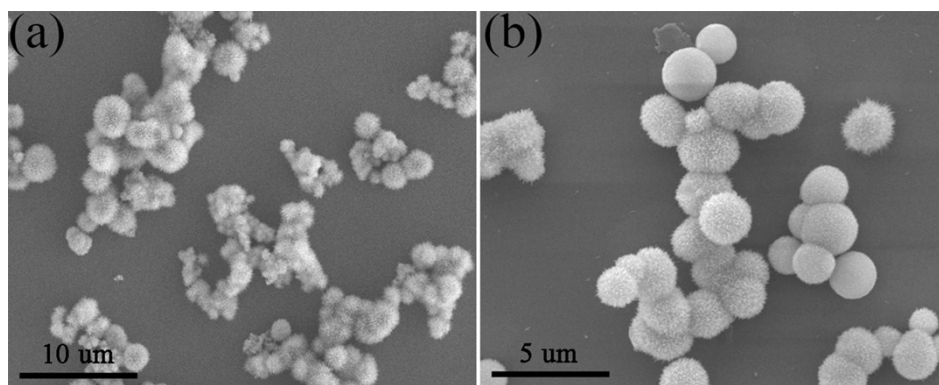

Figure S3 SEM images of the products using  $\text{Mn}(\text{NO}_3)_2$  (a) and  $\text{MnSO}_4$  (b) as raw source
